# Supplementary material
Source: Springer Nature journal article supplement (https://www.springermedizin.de/resource/supplementary/12958_2009_541_MOESM3_ESM.pdf/9568262)

For all three follicle types

Day effect : P=0.08

Size category: P<0.01

Day\*Size category: P<0.01

--- 200 to 340  $\mu$  follicles

— 350 to 500  $\mu$  follicles

- - - > 500  $\mu$  follicles

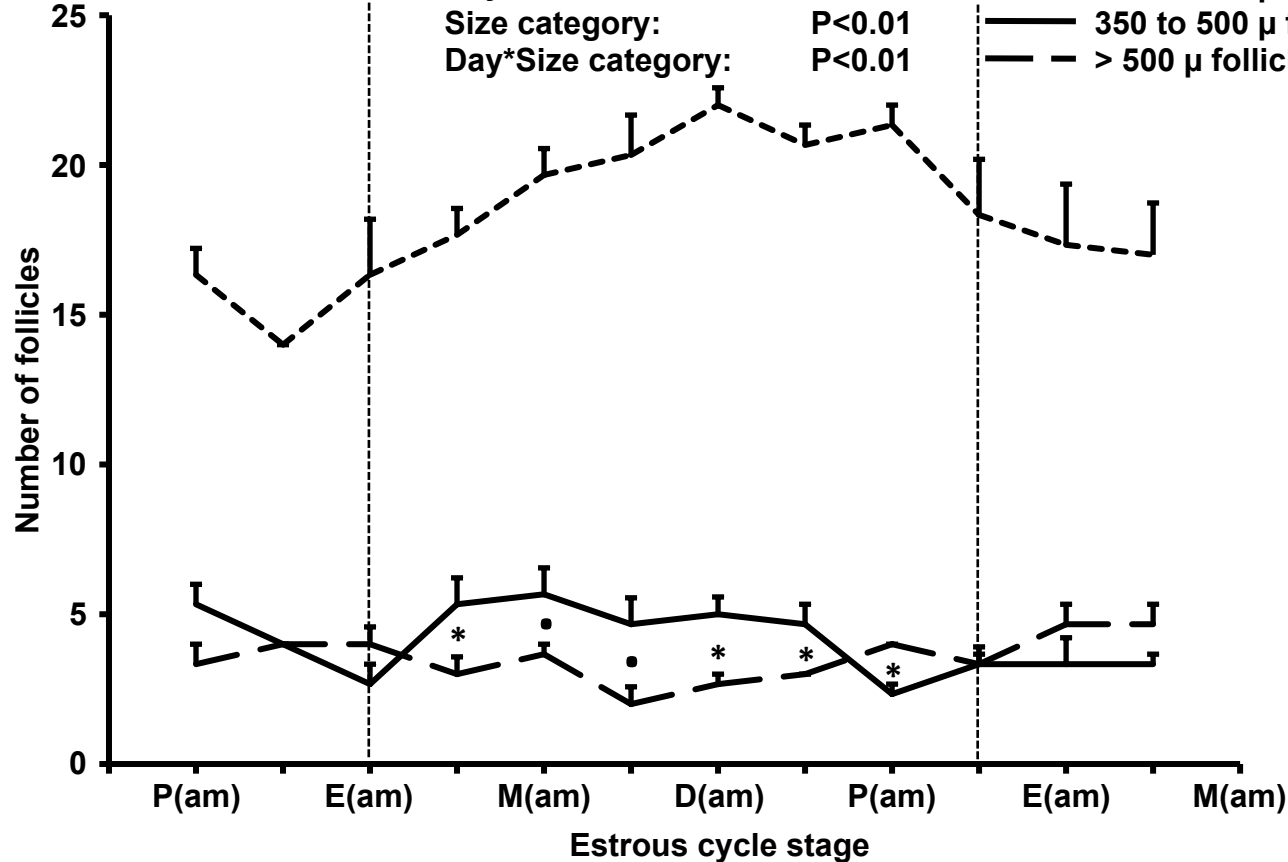

Supplement: MOESM3 [file 9568262]
